# Supplementary material
Source: PubMed Central journal article supplement (PMC7713715)
Supplement: NIHMS1066813-supplement-1.pdf [file NIHMS1066813-supplement-1.pdf]

## Supporting Information

### How Do We Measure Poly- and Perfluoroalkyl Substances (PFASs) at the Surface of Consumer Products?

*Environmental Science and Technology LETTERS*

**Andrea K. Tokranov<sup>†\*</sup>, Nicole Nishizawa<sup>†</sup>, Carlo Alberto Amadei<sup>†</sup>, Jenny E. Zenobio<sup>‡</sup>,  
Heidi M. Pickard<sup>†</sup>, Joseph G. Allen<sup>§</sup>, Chad D. Vecitis<sup>†</sup>, and Elsie M. Sunderland<sup>†,§</sup>**

<sup>†</sup> Harvard John A. Paulson School of Engineering and Applied Sciences, Cambridge, MA 02138

<sup>‡</sup> Department of Agronomy, Interdisciplinary Ecological Science and Engineering, Purdue  
University, West Lafayette, IN 47907-2054

<sup>§</sup> Department of Environmental Health, Harvard T. H. Chan School of Public Health, Harvard  
University, Boston, MA 02115

## Table of Contents

|                                                                                                                |           |
|----------------------------------------------------------------------------------------------------------------|-----------|
| <b>Methods</b> .....                                                                                           | <b>3</b>  |
| Materials.....                                                                                                 | 3         |
| LC-MS/MS Extraction .....                                                                                      | 3         |
| LC-MS/MS Analysis .....                                                                                        | 3         |
| Quality Assurance/Quality Control .....                                                                        | 4         |
| XPS Analysis .....                                                                                             | 5         |
| Methanol Extraction for XPS .....                                                                              | 5         |
| LC-QTOF-MS Analysis .....                                                                                      | 6         |
| <b>Calculations</b> .....                                                                                      | <b>7</b>  |
| Sputtering Yield for Consumer Products .....                                                                   | 7         |
| XPS and LC-MS/MS Weight Percent .....                                                                          | 7         |
| <b>Tables</b> .....                                                                                            | <b>8</b>  |
| Table S1. Sample Inventory .....                                                                               | 8         |
| Table S2. Compound Names, Abbreviations, Internal Standards, Molecular Formulas and<br>Molecular Weights ..... | 11        |
| Table S3. LC-MS/MS Parameters .....                                                                            | 12        |
| Table S4. LC-MS/MS Results (nmol m <sup>-2</sup> ).....                                                        | 13        |
| Table S5. LC-MS/MS Results (µg kg <sup>-1</sup> ) .....                                                        | 18        |
| Table S6. LC-MS/MS Method Quantification Limits .....                                                          | 22        |
| Table S7. LC-MS/MS Recovery and Precision Results .....                                                        | 23        |
| Table S8. XPS Results.....                                                                                     | 24        |
| Table S9. LC-QTOF-MS Results.....                                                                              | 25        |
| <b>Figures</b> .....                                                                                           | <b>27</b> |
| Figure S1. Additional XPS Depth Profiles.....                                                                  | 27        |
| Figure S2. Repetitive XPS Depth Profile Analysis of Sample 4. ....                                             | 28        |
| Figure S3. XPS wt.% F and LC-MS/MS wt.% F Comparison.....                                                      | 29        |
| Figure S4. Comparison of LC-MS/MS and XPS Data.....                                                            | 30        |
| <b>References</b> .....                                                                                        | <b>30</b> |

## Methods

**Materials.** A Thermo Scientific™ Barnstead™ GenPure™ xCAD Plus (Lake Balboa, CA, U.S.A.) UV-TOC provided ultrapure deionized water (DI) with a resistivity of  $>18 \text{ M}\Omega \cdot \text{cm}$ . LC-MS grade methanol (J.T. Baker, Center Valley, PA, U.S.A.), reagent grade formic acid and BioUltra ammonium acetate were obtained from Sigma Aldrich (St. Louis, MO, U.S.A.).

**LC-MS/MS Extraction.** The methanol extraction was adapted from previous studies.<sup>1,2</sup> For this study,  $1 \pm 0.03 \text{ g}$  subsamples (when possible) were cut with methanol-cleaned scissors and added to 15 mL polypropylene centrifuge tubes. Then, 12 mL of methanol was added to each centrifuge tube. Each sample was placed on a rotating shaker table for 1 hour and bath sonicated at  $40 \text{ }^\circ\text{C}$  for 2 hours. Samples were then centrifuged at 4,000 rcf for 10 minutes and the supernatant was decanted into a new 15 mL polypropylene centrifuge tube and kept at  $4 \text{ }^\circ\text{C}$  until analysis. One blank centrifuge tube was extracted within every set of 12 samples. We also assessed the sample area:weight ratio to convert concentrations into units of  $\text{nmol m}^{-2}$  (Table S4).

**LC-MS/MS Analysis.** Before LC-MS/MS analysis, the methanol extracts were warmed to room temperature and inverted before subsampling. An aliquot of methanol extract ( $705 \text{ }\mu\text{L}$ ) was combined with DI Water ( $750 \text{ }\mu\text{L}$ ) and  $10 \text{ ng mL}^{-1}$  internal standard solution ( $45 \text{ }\mu\text{L}$ ) in a polypropylene microcentrifuge tube. Samples were then briefly vortexed, centrifuged at 13,000 rpm, and then the supernatant was transferred to a polypropylene autosampler vial for analysis with an Agilent (Santa Clara, CA) 6460 triple quadrupole LC-MS/MS with electrospray ionization in negative ion mode. LC-MS/MS analysis followed the procedure outlined in Weber et al.<sup>3</sup> The injection volume was  $300 \text{ }\mu\text{L}$ . All calibration samples were prepared in a 50:50 methanol:water

solution to match the sample composition. In this study, the linear calibration ranged from ~2 ng L<sup>-1</sup> - 1200 ng L<sup>-1</sup>, contained up to 8 points, and was forced through zero and 1/x weighted. All compounds were required to have  $r^2 > 0.99$  for the calibration. N-EtFOSAA and N-MeFOSAA were added to the compounds measured by Weber et al.<sup>3</sup> (see Table S3 for parameters). If samples exceeded the calibration range by over 15% they were diluted and re-analyzed.

The limit of quantification was defined as the average sample concentration at which the signal-to-noise ratio was 10, plus the concentration of any LC-MS/MS blank (50:50 DI water:methanol with internal standards) above this value. The method quantification limit (MQL) was corrected for dilution. All blanks included in the extraction procedure were below the MQL.

**Quality Assurance/Quality Control.** Duplicate injections of ~20% of the samples were completed and the results were averaged (average relative percent difference <25% except for N-EtFOSAA, which was 74% for a single sample). Recovery and precision experiments were performed on 3 samples (1 food contact material: plate, 1 textile: carpet, 1 domestic product: curtain) that had initial PFAS concentrations below the MQL to evaluate the effectiveness of the extraction method. Briefly, four  $1 \pm 0.03$  g samples were cut from the chosen samples and added to individual 15 mL polypropylene centrifuge tubes. All 12 sample was spiked with 7.2 ng of a native stock solution in methanol. The stock solution was added directly onto the sample and left to equilibrate for 30 minutes at room temperature. The extraction and analysis followed the methods outlined in the LC-MS/MS Extraction section. See Table S7 for results. Percent recoveries were within  $\pm 30\%$  of expected values except for PFBS (66.3% recovery, plate), FOSA (69% recovery, plate and 69.7% recovery, carpet) and 8:2 FtS, which was removed from further consideration due to recoveries of only 22.6% for the carpet sample. Recoveries of 8:2 FtS may have been low due to matrix effects. PFDS was removed from further consideration due to poor reproducibility of continuing calibration checks.

**XPS Analysis.** The peak deconvolution and atomic ratio were calculated using the Thermo Scientific Avantage software. The accuracy of the C1s peak fitting is  $\pm 2\%$ . The pass energy was 50 eV for the high-resolution scans and 200 eV for the survey. At least 2 scans were performed for each data point for both the survey and the high-resolution scan. For food contact materials the food contact side was measured, whereas for textiles, the outer surface was measured (outer lining of jackets, the surface that humans would come into contact with for upholstery, etc.). For domestic products, the surface that was presumed to come into contact with humans most frequently was measured. Depth profiles were completed by etching with a monatomic argon ion beam (ion gun energy = 250 eV) with 10 seconds intervals. The material etching rate was  $0.15 \text{ nm sec}^{-1}$ , based on a tantalum pentoxide reference material. Therefore, 1.5 nm of material was etched between each XPS data point. However, because consumer products likely are not etched at the same rate as tantalum pentoxide, we estimated an etching rate of  $15 \text{ nm sec}^{-1}$  (see below section on Sputtering Yield for Consumer Products).

**Methanol Extraction for XPS.** To reduce variability, a small section ( $<1 \text{ cm}^2$ ) of material was removed for pre-extraction XPS, and then a second subsample neighboring the first subsample was removed for post-extraction XPS. Samples were extracted following the LC-MS/MS extraction procedure outlined above, and then air-dried before analysis with XPS. Four samples with no fluorine pre-extraction were also included as controls. One of these controls (sample 9) had detectable fluorine post-extraction. The extraction was repeated, but sample 9 still displayed a small fluorine peak ( $<1.5\% \text{ F}$ ) in the post-extraction sample. In both experiments, sample 9 had no fluorine detected via XPS pre-extraction. The other samples included as blank controls had no fluorine pre- or post-extraction. Sample 9 has a polylactic acid lining (Table S1). Methanol extraction may have removed this lining, exposing an underlying fluorine-containing surface. This is supported by the LC-MS/MS results, which show PFHxA and PFOA were present in sample 9.

**LC-QTOF-MS Analysis.** A Shimadzu high performance reverse-phase liquid chromatography (HPLC) system coupled with a Sciex 5600 Triple Quadrupole Time-of-Flight (QTOF) MS was used to analyze methanol extracts from the 11 samples that had detectable fluorine with XPS. Samples were extracted as outlined in the LC-MS/MS Extraction section, but with ACS-grade methanol. This analysis was completed to determine whether there were structures not captured with LC-MS/MS analysis prevalent in the samples. The HPLC was fitted with a Kinetex EVO C18 (2x.1 x 100 mm, 5  $\mu\text{m}$ , 100  $\text{\AA}$ ) column kept at 40  $^{\circ}\text{C}$  and equipped with a Phenomenex AF0-8497 filter. The injection volume was 50  $\mu\text{L}$  for each sample and mobile phases were water with 0.15% acetic acid (A) and 20 mM ammonium acetate in methanol (B). Samples were scanned in both positive and negative ESI scan modes, and data acquisition and processing were performed using Analyst TF 1.6 and PeakView 2.2 software, respectively.

## Calculations

**Sputtering Yield for Consumer Products.** We determined the depth of etching achieved in each step based on the sputtering yield (atoms/argon ion) of the material.<sup>4-6</sup> The XPS etching rate is based on a tantalum pentoxide reference material (0.15 nm s<sup>-1</sup>, with 10 seconds of etching between each data point), which is likely not similar to the consumer products measured here due to differences between organic and inorganic materials.<sup>5</sup> A formula derived in previous work<sup>5</sup> was applied here, and the etching rate of the consumer products was estimated to be less than 2 orders of magnitude larger than the etching rate for tantalum pentoxide, assuming the samples are similar to organics like polystyrene or polycarbonate. We consider 2 orders of magnitude an upper bound, since fluoropolymers like PTFE and PVDF were found to have sputtering yields less than polystyrene or polycarbonate,<sup>7</sup> and these samples are known to contain carbon-fluorine bonds. This results in a maximum estimated etching depth of ~10 μm for the depth profiles shown here (Figures S1) and in the manuscript.

**XPS and LC-MS/MS Weight Percent.** XPS results in atomic percent fluorine were converted to weight percent fluorine as follows:

$$wt\% F = \frac{at\% F * A_r(F)}{at\% F * A_r(F) + \sum_{i=element} at \% i * A_r(i)} * 100$$

Where  $A_r(\text{element})$  is the atomic weight of the element and  $i$  cycles through all elements detected in the sample in addition to fluorine.

Assuming all fluorine originated from the top 10 nm of materials, LC-MS/MS results were converted to weight percent. The following equation uses PFOA as an example:

$$wt. \% F = \frac{nmol_{PFOA \text{ extracted}}}{g_{mat}} * \frac{mol}{10^9 nmol} * \frac{15 mol_F}{1 mol_{PFOA}} * \frac{19 g_F}{1 mol_F} * \frac{Sample \ Thickness \ (nm)}{10nm}$$

Where  $g_{mat}$  is the total weight of the material extracted.

## Tables

**Table S1.** Sample inventory. FCM = Food contact material.

| Sample # | Weight of Material Extracted (g) | Weight/Area Ratio (g m <sup>-2</sup> ) | Category | Sub-Category | New/Used | Country of Origin | Compostable | Material                                                  |
|----------|----------------------------------|----------------------------------------|----------|--------------|----------|-------------------|-------------|-----------------------------------------------------------|
| 1        | 1.00                             | 339.0                                  | FCM      | Bowl         | New      |                   | yes         | Molded Fiber                                              |
| 2        | 1.01                             | 234.0                                  | FCM      | Plate        | New      |                   | yes         | Molded Fiber                                              |
| 3        | 1.01                             | 338.7                                  | FCM      | Plate        | New      |                   | yes         | Plant Fiber                                               |
| 4        | 1.00                             | 458.9                                  | FCM      | Takeout Box  | New      |                   | yes         |                                                           |
| 5        | 0.99                             | 391.4                                  | FCM      | Takeout Box  | New      |                   | yes         | Plant Fiber                                               |
| 6        | 1.00                             | 359.0                                  | FCM      | Takeout Box  | New      |                   | yes         | Plant Fiber                                               |
| 7        | 1.00                             | 365.3                                  | FCM      | Takeout Box  | New      |                   | yes         | Plant-Based                                               |
| 8        | 1.01                             | 402.8                                  | FCM      | Takeout Box  | New      |                   | yes         |                                                           |
| 9        | 1.00                             | 414.1                                  | FCM      | Takeout Box  | New      |                   | yes         | Plant-Based, Polylactic Acid Lining                       |
| 10       | 1.01                             | 396.3                                  | FCM      | Takeout Box  | New      |                   | yes         |                                                           |
| 11       | 1.00                             | 373.0                                  | FCM      | Takeout Box  | New      |                   | Unknown     |                                                           |
| 12       | 1.00                             | 415.6                                  | FCM      | Bowl         | New      |                   | Unknown     |                                                           |
| 13       | 1.01                             | 90.97                                  | FCM      | Popcorn Bag  | New      | USA               | Unknown     |                                                           |
| 14       | 1.02                             | 29.71                                  | FCM      | Food Bag     | New      |                   | Unknown     |                                                           |
| 15       | 0.99                             | 1545                                   | FCM      | Utensil      | New      |                   | yes         |                                                           |
| 16       | 0.99                             | 402.5                                  | FCM      | Cup          | New      |                   | yes         | Plant-Based Lining<br>Plant Fiber, Post Consumer Material |
| 17       | 1.01                             | 398.8                                  | FCM      | Takeout Box  | New      |                   | yes         |                                                           |
| 18       | 1.01                             | 306.3                                  | FCM      | Cup          | New      |                   | yes         | Paper, Plant-Based Lining                                 |
| 19       | 1.01                             | 895.6                                  | FCM      | Plate        | New      |                   | yes         | Palm Leaves                                               |
| 20       | 1.01                             | 605.5                                  | FCM      | Tray         | New      |                   | yes         | Palm Leaves                                               |
| 21       | 1.00                             | 346.6                                  | FCM      | Takeout Box  | New      |                   | yes         | Polylactic Acid                                           |
| 22       | 1.00                             | 336.1                                  | FCM      | Bowl         | New      |                   | yes         | Paper, Plant-Based Lining                                 |
| 23       | 0.99                             | 347.6                                  | FCM      | Bowl         | New      |                   | yes         | Plant-Based                                               |
| 24       | 0.99                             | 352.0                                  | FCM      | Cup          | New      | USA               | yes         | Polylactic Acid                                           |
| 25       | 1.00                             | 287.5                                  | FCM      | Cup          | New      | USA               | yes         | Polylactic Acid                                           |
| 26       | 0.98                             | 354.4                                  | FCM      | Lid          | New      | USA               | yes         | Polylactic Acid                                           |
| 27       | 1.01                             | 302.4                                  | FCM      | Cup          | New      |                   | yes         | Paper, Plant-Based Lining                                 |
| 28       | 1.01                             | 377.7                                  | FCM      | Lid          | New      |                   | yes         | Polylactic Acid                                           |
| 29       | 1.00                             | 304.9                                  | FCM      | Takeout Box  | New      |                   | yes         | Polylactic Acid                                           |
| 30       | 0.99                             | 296.3                                  | FCM      | Takeout Box  | New      |                   | yes         |                                                           |
| 31       | 1.00                             | 333.2                                  | FCM      | Takeout Box  | New      |                   | Unknown     |                                                           |



| Sample # | Weight of Material Extracted (g) | Weight/Area Ratio (g m <sup>-2</sup> ) | Category | Sub-Category | New/Used | Country of Origin | Compostable | Material                                                                     |
|----------|----------------------------------|----------------------------------------|----------|--------------|----------|-------------------|-------------|------------------------------------------------------------------------------|
| 32       | 1.01                             | 372.6                                  | FCM      | Cup          | New      |                   | Unknown     |                                                                              |
| 33       | 0.99                             | 249.2                                  | FCM      | Cup          | New      |                   | Unknown     |                                                                              |
| 34       | 1.01                             | 38.92                                  | FCM      | Food Bag     | New      |                   | Unknown     |                                                                              |
| 35       | 1.01                             | 340.6                                  | FCM      | Bowl         | New      |                   | Unknown     |                                                                              |
| 36       | 0.99                             | 276.1                                  | FCM      | Cup          | New      |                   | Unknown     |                                                                              |
| 37       | 1.02                             | 266.5                                  | FCM      | Cup          | New      |                   | Unknown     | Polypropylene                                                                |
| 38       | 0.99                             | 344.8                                  | FCM      | Lid          | New      |                   | Unknown     | Polyethylene Terephthalate                                                   |
| 39       | 1.01                             | 355.1                                  | FCM      | Lid          | New      |                   | Unknown     | Polyethylene Terephthalate                                                   |
| 40       | 0.99                             | 386.1                                  | FCM      | Cup          | New      |                   | Unknown     | Polystyrene                                                                  |
| 41       | 0.99                             | 49.78                                  | FCM      | Food Bag     | New      |                   | Unknown     |                                                                              |
| 42       | 1.01                             | 755.1                                  | FCM      | Food Stick   | New      |                   | Unknown     |                                                                              |
| 43       | 1.00                             | 268.2                                  | FCM      | Plate        | New      |                   | Unknown     | Paper                                                                        |
| 44       | 1.02                             | 218.2                                  | FCM      | Cup          | New      | USA               | Unknown     |                                                                              |
| 45       | 1.01                             | 39.06                                  | FCM      | Food Paper   | New      | USA               | Unknown     |                                                                              |
| 46       | 1.02                             | 3017                                   | Textile  | Carpet       | New      |                   |             | Nylon Fiber                                                                  |
| 47       | 1.01                             | 394.7                                  | Textile  | Upholstery   | New      |                   |             | Polyester, Dyed Nylon, Acrylic                                               |
| 48       | 1.02                             | 2721                                   | Textile  | Carpet       | New      |                   |             | Nylon Fiber                                                                  |
| 49       | 1.01                             | 2303                                   | Textile  | Carpet       | New      |                   |             | Polyester Fiber                                                              |
| 50       | 1.00                             | 2655                                   | Textile  | Carpet       | New      |                   |             | Nylon Fiber                                                                  |
| 51       | 1.00                             | 383.5                                  | Textile  | Upholstery   | New      | USA               |             | Nylon, Polyester, Acrylic                                                    |
| 52       | 0.99                             | 2348                                   | Textile  | Carpet       | New      |                   |             | Nylon Fiber<br>Polyester, Polytrimethylene<br>Terephthalate Fiber            |
| 53       | 0.98                             | 2513                                   | Textile  | Carpet       | New      |                   |             |                                                                              |
| 54       | 1.00                             | 522.7                                  | Textile  | Upholstery   | New      | USA               |             | Cotton, Nylon, Polyester, Acrylic<br>Polytrimethylene Terephthalate<br>Fiber |
| 55       | 0.98                             | 2375                                   | Textile  | Carpet       | New      |                   |             |                                                                              |
| 56       | 1.01                             | 2500                                   | Textile  | Carpet       | New      |                   |             | Nylon Fiber                                                                  |
| 57       | 0.99                             | 226.6                                  | Textile  | Backpack     | New      | China             |             | Nylon, Polyester                                                             |
| 58       | 0.99                             | 259.6                                  | Textile  | Backpack     | New      | Vietnam           |             | Nylon, Polyester                                                             |
| 59       | 1.02                             | 154.0                                  | Textile  | Mattress Pad | New      |                   |             |                                                                              |
| 60       | 1.01                             | 3500                                   | Textile  | Carpet       | Used     |                   |             |                                                                              |
| 61       | 1.00                             | 245.0                                  | Textile  | Upholstery   | Used     | Taiwan            |             |                                                                              |
| 62       | 0.57                             | 555.6                                  | Textile  | Upholstery   | Used     |                   |             | Leather                                                                      |
| 63       | 1.02                             | 280.7                                  | Textile  | Jacket       | Used     | China             |             | Polyurethane Shell                                                           |
| 64       | 0.60                             | 844.2                                  | Textile  | Upholstery   | Used     | USA               |             | Leather                                                                      |
| 65       | 0.87                             | 416.6                                  | Textile  | Upholstery   | Used     | USA               |             |                                                                              |

| Sample # | Weight of Material Extracted (g) | Weight/Area Ratio (g m <sup>-2</sup> ) | Category       | Sub-Category   | New/Used | Country of Origin | Compostable | Material                                                |
|----------|----------------------------------|----------------------------------------|----------------|----------------|----------|-------------------|-------------|---------------------------------------------------------|
| 66       | 1.02                             | 329.1                                  | Textile        | Jacket         | Used     | Pakistan          |             | Cotton, Polyester                                       |
| 67       | 1.01                             | 65.16                                  | Textile        | Jacket         | Used     | Taiwan            |             | Nylon                                                   |
| 68       | 0.99                             | 81.00                                  | Textile        | Jacket         | Used     |                   |             |                                                         |
| 69       | 0.99                             | 3802                                   | Textile        | Carpet         | New      |                   |             | Nylon Fibers                                            |
| 70       | 0.98                             | 3677                                   | Textile        | Carpet         | New      |                   |             |                                                         |
| 71       | 1.00                             | 27.48                                  | Textile        | Jacket         | New      | China             |             | Ethylene-Vinyl Acetate                                  |
| 72       | 0.99                             | 2336                                   | Textile        | Carpet         | New      |                   |             | Nylon Fiber                                             |
| 73       | 1.00                             | 2194                                   | Textile        | Carpet         | New      |                   |             | Nylon Fiber                                             |
| 74       | 1.01                             | 2692                                   | Textile        | Carpet         | New      |                   |             | Nylon Fiber                                             |
| 75       | 1.01                             | 2314                                   | Textile        | Carpet         | New      |                   |             | Wool, Olefin, Polypropylene                             |
| 76       | 0.98                             | 2367                                   | Textile        | Carpet         | New      |                   |             | Wool, Olefin, Polypropylene                             |
| 77       | 1.01                             | 2222                                   | Textile        | Carpet         | New      |                   |             | Polyester, Polypropylene                                |
| 78       | 1.00                             | 2200                                   | Textile        | Carpet         | New      |                   |             | Polyester, Polypropylene                                |
| 79       | 1.02                             | 2967                                   | Textile        | Carpet         | New      |                   |             | Polytrimethylene Terephthalate, Polypropylene           |
| 80       | 1.01                             | 476.0                                  | Textile        | Backpack       | New      | China             |             | Cotton                                                  |
| 81       | 1.00                             | 476.7                                  | Textile        | Backpack       | New      | China             |             | Nylon, Polyester<br>Polyurethane, Viscose,<br>Polyester |
| 82       | 1.00                             | 350.1                                  | Textile        | Jacket         | Used     |                   |             |                                                         |
| 83       | 1.01                             | 298.2                                  | Domestic Prod. | Bandage        | New      | China             |             |                                                         |
| 84       | 1.03                             | 46.52                                  | Domestic Prod. | Lens Wipes     | New      |                   |             | Microfiber                                              |
| 85       | 1.00                             | 813.7                                  | Domestic Prod. | Boot           | Used     | China             |             |                                                         |
| 86       | 1.00                             | 66.67                                  | Domestic Prod. | Mask           | New      | China             |             | Polypropylene                                           |
| 87       | 0.99                             | 770.4                                  | Domestic Prod. | Bandage        | New      | Hungary           |             |                                                         |
| 88       | 1.00                             | 166.1                                  | Domestic Prod. | Folder         | New      | USA               |             |                                                         |
| 89       | 1.02                             | 92.12                                  | Domestic Prod. | Label          | New      | Mexico            |             |                                                         |
| 90       | 1.00                             | 438.7                                  | Domestic Prod. | Notebook Cover | New      | Vietnam           |             |                                                         |
| 91       | 1.02                             | 265.9                                  | Domestic Prod. | Dry Erase Tape | New      | USA               |             |                                                         |
| 92       | 1.01                             | 259.0                                  | Domestic Prod. | Folder         | New      | China             |             |                                                         |
| 93       | 1.01                             | 220.7                                  | Domestic Prod. | Shower Curtain | New      |                   |             |                                                         |
| 94       | 1.01                             | 293.0                                  | Domestic Prod. | Mask           | New      | USA               |             | Polyurethane Foam,<br>Polypropylene, Polyester          |

**Table S2.** Compound names, abbreviations, internal standards, molecular formulas and molecular weights. Modified from Weber et al.<sup>3</sup>

| Compound Name                                   | Abbreviation | Internal Standard                        | Mol. Formula                                                                                                     | Mol. Weight |
|-------------------------------------------------|--------------|------------------------------------------|------------------------------------------------------------------------------------------------------------------|-------------|
| <b>Perfluorinated Carboxylates</b>              |              |                                          |                                                                                                                  |             |
| Perfluorobutanoate                              | PFBA         | [ <sup>13</sup> C <sub>4</sub> ] PFBA    | C <sub>3</sub> F <sub>7</sub> COO <sup>-</sup>                                                                   | 213         |
| Perfluoropentanoate                             | PFPeA        | [ <sup>13</sup> C <sub>2</sub> ] PFHxA   | C <sub>4</sub> F <sub>9</sub> COO <sup>-</sup>                                                                   | 263         |
| Perfluorohexanoate                              | PFHxA        | [ <sup>13</sup> C <sub>2</sub> ] PFHxA   | C <sub>5</sub> F <sub>11</sub> COO <sup>-</sup>                                                                  | 313         |
| Perfluoroheptanoate                             | PFHpA        | [ <sup>13</sup> C <sub>2</sub> ] PFHxA   | C <sub>6</sub> F <sub>13</sub> COO <sup>-</sup>                                                                  | 363         |
| Perfluorooctanoate                              | PFOA         | [ <sup>13</sup> C <sub>4</sub> ] PFOA    | C <sub>7</sub> F <sub>15</sub> COO <sup>-</sup>                                                                  | 413         |
| Perfluorononanoate                              | PFNA         | [ <sup>13</sup> C <sub>5</sub> ] PFNA    | C <sub>8</sub> F <sub>17</sub> COO <sup>-</sup>                                                                  | 463         |
| Perfluorodecanoate                              | PFDA         | [ <sup>13</sup> C <sub>2</sub> ] PFDA    | C <sub>9</sub> F <sub>19</sub> COO <sup>-</sup>                                                                  | 513         |
| Perfluoroundecanoate                            | PFUnDA       | [ <sup>13</sup> C <sub>2</sub> ] PFUnDA  | C <sub>10</sub> F <sub>21</sub> COO <sup>-</sup>                                                                 | 563         |
| Perfluorododecanoate                            | PFDoDA       | [ <sup>13</sup> C <sub>2</sub> ] PFDoDA  | C <sub>11</sub> F <sub>23</sub> COO <sup>-</sup>                                                                 | 613         |
| <b>Perfluorinated Sulfonates</b>                |              |                                          |                                                                                                                  |             |
| Perfluorobutane sulfonate                       | PFBS         | [ <sup>18</sup> O <sub>2</sub> ] PFHxS   | C <sub>4</sub> F <sub>9</sub> SO <sub>3</sub> <sup>-</sup>                                                       | 299         |
| Perfluorohexane sulfonate                       | PFHxS        | [ <sup>18</sup> O <sub>2</sub> ] PFHxS   | C <sub>6</sub> F <sub>13</sub> SO <sub>3</sub> <sup>-</sup>                                                      | 399         |
| Perfluorooctane sulfonate                       | PFOS         | [ <sup>13</sup> C <sub>4</sub> ] PFOS    | C <sub>8</sub> F <sub>17</sub> SO <sub>3</sub> <sup>-</sup>                                                      | 499         |
| Perfluorodecane sulfonate                       | PFDS         | [ <sup>13</sup> C <sub>4</sub> ] PFOS    | C <sub>10</sub> F <sub>21</sub> SO <sub>3</sub> <sup>-</sup>                                                     | 599         |
| <b>Perfluoroalkyl Sulfonamides</b>              |              |                                          |                                                                                                                  |             |
| Perfluorooctane sulfonamide                     | FOSA         | [ <sup>13</sup> C <sub>8</sub> ] FOSA    | C <sub>8</sub> F <sub>17</sub> SO <sub>2</sub> NH <sub>2</sub>                                                   | 498         |
| <b>Perfluoroalkyl Sulfonamidoacetic Acids</b>   |              |                                          |                                                                                                                  |             |
| N-Methyl perfluorooctane sulfonamidoacetic acid | N-MeFOSAA    | d5-N-MeFOSAA                             | C <sub>8</sub> F <sub>17</sub> SO <sub>2</sub> N(CH <sub>3</sub> )CH <sub>2</sub> COO <sup>-</sup>               | 570         |
| N-Ethyl perfluorooctane sulfonamidoacetic acid  | N-EtFOSAA    | d3-N-EtFOSAA                             | C <sub>8</sub> F <sub>17</sub> SO <sub>2</sub> N(C <sub>2</sub> H <sub>5</sub> )CH <sub>2</sub> COO <sup>-</sup> | 584         |
| <b>Fluorotelomer Sulfonates</b>                 |              |                                          |                                                                                                                  |             |
| 6:2 fluorotelomer sulfonate                     | 6:2 FtS      | [ <sup>13</sup> C <sub>2</sub> ] 6:2 FtS | C <sub>6</sub> F <sub>13</sub> CH <sub>2</sub> CH <sub>2</sub> SO <sub>3</sub> <sup>-</sup>                      | 427         |
| 8:2 fluorotelomer sulfonate                     | 8:2 FtS      | [ <sup>13</sup> C <sub>2</sub> ] 6:2 FtS | C <sub>8</sub> F <sub>17</sub> CH <sub>2</sub> CH <sub>2</sub> SO <sub>3</sub> <sup>-</sup>                      | 527         |

**Table S3.** LC-MS/MS parameters for N-EtFOSAA and N-MeFOSAA. All other parameters were as defined in Weber et al.<sup>3</sup>

| <b>Analyte</b>                                | <b>Type</b> | <b>Internal Standard</b> | <b>Precursor Ion Mass</b> | <b>Product Ion Mass</b> | <b>Fragmentor Voltage (V)</b> | <b>Collision Energy (V)</b> |
|-----------------------------------------------|-------------|--------------------------|---------------------------|-------------------------|-------------------------------|-----------------------------|
| <b>Perfluoroalkyl Sulfonamidoacetic Acids</b> |             |                          |                           |                         |                               |                             |
| N-EtFOSAA                                     | Target      | d3-N-EtFOSAA             | 584                       | 419                     | 110                           | 15                          |
| N-EtFOSAA (Q1)                                |             |                          |                           | 526                     |                               | 20                          |
| N-MeFOSAA                                     | Target      | d5-N-MeFOSAA             | 570                       | 419                     | 120                           | 20                          |
| N-MeFOSAA (Q1)                                |             |                          |                           | 512                     |                               | 20                          |
| <b>Internal Standards</b>                     |             |                          |                           |                         |                               |                             |
| d3-N-EtFOSAA                                  | ISTD        |                          | 589                       | 419                     | 120                           | 15                          |
| d5-N-MeFOSAA                                  | ISTD        |                          | 573                       | 419                     | 120                           | 20                          |

**Table S4.** LC-MS/MS results for all PFASs quantified (nmol m<sup>-2</sup>). Samples above the MQL, but with qualifiers out of range are labeled QH (qualifier above ±30% range) or QL (qualifier below ±30% range). PFCAs = perfluorinated carboxylates, PFSA = perfluorinated sulfonates, precursors = perfluoroalkyl acid precursors.

| Sample # | PFCAs |       |       |       |       |       |       |        |        | PFSA |       |      | Precursors |           |           |      |
|----------|-------|-------|-------|-------|-------|-------|-------|--------|--------|------|-------|------|------------|-----------|-----------|------|
|          | PFBA  | PFPeA | PFHxA | PFHpA | PFOA  | PFNA  | PFDA  | PFUnDA | PFDoDA | PFBS | PFHxS | PFOS | 6:2 FtS    | N-MeFOSAA | N-EtFOSAA | FOSA |
| 1        | 958   | 76.6  | 837   | 28.5  | 6.98  | <MQL  | 0.719 | <MQL   | <MQL   | <MQL | <MQL  | <MQL | <MQL       | <MQL      | 0.203     | <MQL |
| 2        | 645   | <MQL  | 538   | 16.9  | 4.01  | 0.199 | 0.606 | <MQL   | 0.184  | <MQL | <MQL  | <MQL | 0.247      | 0.323     | 0.279     | <MQL |
| 3        | 2.56  | 2.31  | 10.8  | 4.77  | 31.4  | 4.54  | 37.9  | 3.19   | 25.0   | <MQL | <MQL  | <MQL | <MQL       | <MQL      | <MQL      | <MQL |
| 4        | 17.6  | 11.1  | 59.9  | 3.44  | <MQL  | <MQL  | <MQL  | <MQL   | <MQL   | <MQL | <MQL  | <MQL | <MQL       | <MQL      | <MQL      | <MQL |
| 5        | <MQL  | <MQL  | 4.90  | 3.78  | 34.9  | 3.28  | 25.3  | 2.00   | 9.86   | <MQL | <MQL  | <MQL | <MQL       | <MQL      | <MQL      | <MQL |
| 6        | <MQL  | 1.85  | 8.24  | 3.49  | 26.3  | 2.57  | 19.6  | 1.34   | 7.88   | <MQL | <MQL  | <MQL | <MQL       | <MQL      | <MQL      | <MQL |
| 7        | <MQL  | <MQL  | 5.75  | 1.73  | 6.35  | 0.682 | 4.08  | QH     | 2.31   | <MQL | <MQL  | <MQL | <MQL       | <MQL      | <MQL      | <MQL |
| 8        | <MQL  | <MQL  | 9.28  | 1.70  | <MQL  | <MQL  | <MQL  | <MQL   | <MQL   | <MQL | <MQL  | <MQL | <MQL       | <MQL      | <MQL      | <MQL |
| 9        | <MQL  | <MQL  | 1.96  | <MQL  | 0.281 | <MQL  | <MQL  | <MQL   | <MQL   | <MQL | <MQL  | <MQL | <MQL       | <MQL      | <MQL      | <MQL |
| 10       | <MQL  | <MQL  | QL    | QL    | 0.429 | 0.354 | QH    | <MQL   | <MQL   | <MQL | <MQL  | <MQL | <MQL       | <MQL      | 0.161     | <MQL |
| 11       | <MQL  | <MQL  | 38.1  | QL    | 0.408 | 0.321 | 0.479 | QL     | 0.542  | <MQL | <MQL  | <MQL | <MQL       | <MQL      | QL        | <MQL |
| 12       | <MQL  | <MQL  | 32.4  | 0.965 | 0.465 | 0.452 | 0.698 | 0.823  | 0.749  | <MQL | <MQL  | <MQL | <MQL       | <MQL      | <MQL      | <MQL |
| 13       | <MQL  | <MQL  | 1.73  | <MQL  | <MQL  | <MQL  | <MQL  | <MQL   | <MQL   | <MQL | <MQL  | <MQL | <MQL       | <MQL      | <MQL      | <MQL |
| 14       | <MQL  | <MQL  | 0.226 | <MQL  | <MQL  | <MQL  | <MQL  | <MQL   | <MQL   | <MQL | <MQL  | <MQL | <MQL       | <MQL      | <MQL      | <MQL |
| 15       | <MQL   | <MQL   | <MQL | <MQL  | <MQL | <MQL       | <MQL      | <MQL      | <MQL |
| 16       | <MQL   | <MQL   | <MQL | <MQL  | <MQL | <MQL       | <MQL      | <MQL      | <MQL |
| 17       | <MQL  | <MQL  | QL    | <MQL  | <MQL  | <MQL  | <MQL  | <MQL   | <MQL   | <MQL | <MQL  | <MQL | <MQL       | <MQL      | <MQL      | <MQL |
| 18       | <MQL  | <MQL  | QL    | <MQL  | <MQL  | <MQL  | <MQL  | <MQL   | <MQL   | <MQL | <MQL  | <MQL | <MQL       | <MQL      | <MQL      | <MQL |
| 19       | <MQL   | <MQL   | <MQL | <MQL  | <MQL | <MQL       | <MQL      | <MQL      | <MQL |
| 20       | <MQL   | <MQL   | <MQL | <MQL  | <MQL | <MQL       | <MQL      | <MQL      | <MQL |



| Sample # | PFCAs |       |       |       |       |       |       |        |        | PFSA |       |      | Precursors |           |           |        |
|----------|-------|-------|-------|-------|-------|-------|-------|--------|--------|------|-------|------|------------|-----------|-----------|--------|
|          | PFBA  | PFPeA | PFHxA | PFHpA | PFOA  | PFNA  | PFDA  | PFUnDA | PFDoDA | PFBS | PFHxS | PFOS | 6:2 FtS    | N-MeFOSAA | N-EtFOSAA | FOSA   |
| 44       | <MQL  | <MQL  | QL    | <MQL  | <MQL  | <MQL  | <MQL  | <MQL   | <MQL   | <MQL | <MQL  | <MQL | <MQL       | <MQL      | <MQL      | <MQL   |
| 45       | <MQL   | <MQL   | <MQL | <MQL  | <MQL | <MQL       | <MQL      | <MQL      | <MQL   |
| 46       | 32.1  | 26.8  | 137   | 30.0  | <MQL  | <MQL  | <MQL  | <MQL   | <MQL   | <MQL | QL    | <MQL | 1.05       | <MQL      | <MQL      | <MQL   |
| 47       | 5.15  | 5.42  | 47.3  | 12.1  | <MQL  | QL    | <MQL  | <MQL   | <MQL   | <MQL | <MQL  | QL   | 0.17       | <MQL      | <MQL      | <MQL   |
| 48       | 9.22  | <MQL  | 37.0  | <MQL  | <MQL  | <MQL  | <MQL  | <MQL   | <MQL   | <MQL | <MQL  | <MQL | <MQL       | <MQL      | <MQL      | <MQL   |
| 49       | 35.0  | <MQL   | <MQL   | QL   | QL    | <MQL | <MQL       | <MQL      | <MQL      | <MQL   |
| 50       | <MQL  | <MQL  | QH    | <MQL  | 3.12  | <MQL  | <MQL  | <MQL   | <MQL   | 21.3 | <MQL  | <MQL | <MQL       | <MQL      | <MQL      | <MQL   |
| 51       | 6.51  | 2.77  | 10.2  | 0.465 | 0.524 | <MQL  | 0.248 | <MQL   | <MQL   | <MQL | <MQL  | <MQL | QH         | <MQL      | <MQL      | <MQL   |
| 52       | <MQL  | <MQL  | 9.82  | <MQL  | QL    | <MQL  | <MQL  | <MQL   | <MQL   | 6.00 | <MQL  | <MQL | <MQL       | <MQL      | <MQL      | <MQL   |
| 53       | 9.04  | <MQL   | <MQL   | 5.74 | QL    | <MQL | <MQL       | <MQL      | <MQL      | <MQL   |
| 54       | 5.43  | <MQL  | 7.08  | 0.569 | 0.364 | QL    | <MQL  | <MQL   | <MQL   | <MQL | <MQL  | <MQL | QH         | <MQL      | <MQL      | <MQL   |
| 55       | 6.25  | <MQL   | <MQL   | 4.83 | QL    | <MQL | <MQL       | <MQL      | <MQL      | <MQL   |
| 56       | <MQL  | <MQL  | 6.46  | <MQL  | <MQL  | <MQL  | <MQL  | <MQL   | <MQL   | <MQL | <MQL  | <MQL | <MQL       | <MQL      | <MQL      | <MQL   |
| 57       | <MQL  | <MQL  | 0.951 | <MQL  | 4.37  | <MQL  | 1.01  | <MQL   | <MQL   | <MQL | <MQL  | <MQL | <MQL       | <MQL      | <MQL      | <MQL   |
| 58       | <MQL  | <MQL  | <MQL  | <MQL  | 1.09  | <MQL  | QH    | <MQL   | <MQL   | <MQL | <MQL  | <MQL | <MQL       | <MQL      | <MQL      | <MQL   |
| 59       | <MQL  | <MQL  | <MQL  | <MQL  | 0.101 | <MQL  | <MQL  | <MQL   | 0.120  | <MQL | <MQL  | <MQL | <MQL       | <MQL      | <MQL      | <MQL   |
| 60       | <MQL  | 15.3  | 157   | 67.6  | 3200  | 61.6  | 1230  | 23.4   | 306    | <MQL | <MQL  | 6.97 | 12.4       | 1.64      | 10.1      | 0.990  |
| 61       | 281   | <MQL  | 0.872 | <MQL  | 3.66  | 19.9  | QH    | 5.33   | QH     | 9.17 | <MQL  | QL   | QH         | <MQL      | QL        | 0.0859 |
| 62       | <MQL  | <MQL  | 4.97  | 4.05  | 6.91  | 2.99  | QH    | QL     | 1.36   | QH   | <MQL  | 12.4 | 2.89       | QH        | QL        | <MQL   |
| 63       | <MQL  | <MQL  | 1.55  | 0.730 | 3.72  | 0.435 | QH    | <MQL   | 0.188  | QH   | 0.505 | 2.90 | <MQL       | 0.169     | 1.37      | <MQL   |
| 64       | <MQL  | <MQL  | <MQL  | QL    | 2.33  | QL    | <MQL  | <MQL   | <MQL   | <MQL | QL    | <MQL | <MQL       | <MQL      | 4.27      | <MQL   |
| 65       | <MQL  | <MQL  | QL    | <MQL  | 2.50  | QH    | QH    | QH     | 0.869  | <MQL | <MQL  | 1.80 | 1.08       | <MQL      | QH        | <MQL   |
| 66       | <MQL  | <MQL  | 0.482 | <MQL  | 1.74  | <MQL  | 1.63  | <MQL   | 0.811  | <MQL | <MQL  | <MQL | <MQL       | <MQL      | <MQL      | <MQL   |

| Sample # | PFCAs |       |       |       |        |        |       |        |        | PFSA |       |        | Precursors |           |           |       |
|----------|-------|-------|-------|-------|--------|--------|-------|--------|--------|------|-------|--------|------------|-----------|-----------|-------|
|          | PFBA  | PFPeA | PFHxA | PFHpA | PFOA   | PFNA   | PFDA  | PFUnDA | PFDoDA | PFBS | PFHxS | PFOS   | 6:2 FtS    | N-MeFOSAA | N-EtFOSAA | FOSA  |
| 67       | <MQL  | <MQL  | <MQL  | <MQL  | 0.378  | 0.0405 | 0.175 | <MQL   | 0.0518 | QL   | <MQL  | <MQL   | <MQL       | <MQL      | 0.0397    | <MQL  |
| 68       | <MQL  | <MQL  | <MQL  | <MQL  | 0.0915 | <MQL   | <MQL  | <MQL   | <MQL   | <MQL | <MQL  | <MQL   | 0.09       | <MQL      | QL        | <MQL  |
| 69       | <MQL  | <MQL  | <MQL  | <MQL  | <MQL   | <MQL   | <MQL  | <MQL   | <MQL   | <MQL | <MQL  | <MQL   | <MQL       | <MQL      | <MQL      | <MQL  |
| 70       | <MQL  | <MQL  | <MQL  | <MQL  | <MQL   | <MQL   | <MQL  | <MQL   | <MQL   | <MQL | <MQL  | <MQL   | <MQL       | <MQL      | <MQL      | <MQL  |
| 71       | <MQL  | <MQL  | <MQL  | <MQL  | <MQL   | <MQL   | <MQL  | <MQL   | <MQL   | <MQL | <MQL  | <MQL   | <MQL       | <MQL      | <MQL      | <MQL  |
| 72       | <MQL  | <MQL  | <MQL  | <MQL  | <MQL   | <MQL   | <MQL  | <MQL   | <MQL   | <MQL | <MQL  | <MQL   | <MQL       | <MQL      | <MQL      | <MQL  |
| 73       | <MQL  | <MQL  | <MQL  | <MQL  | <MQL   | <MQL   | <MQL  | <MQL   | <MQL   | <MQL | <MQL  | <MQL   | <MQL       | <MQL      | <MQL      | <MQL  |
| 74       | <MQL  | <MQL  | <MQL  | <MQL  | <MQL   | <MQL   | <MQL  | <MQL   | <MQL   | <MQL | <MQL  | <MQL   | <MQL       | <MQL      | <MQL      | <MQL  |
| 75       | <MQL  | <MQL  | <MQL  | <MQL  | <MQL   | <MQL   | <MQL  | <MQL   | <MQL   | <MQL | <MQL  | <MQL   | <MQL       | <MQL      | <MQL      | <MQL  |
| 76       | <MQL  | <MQL  | <MQL  | <MQL  | <MQL   | <MQL   | <MQL  | <MQL   | <MQL   | <MQL | <MQL  | <MQL   | <MQL       | <MQL      | <MQL      | <MQL  |
| 77       | <MQL  | <MQL  | <MQL  | <MQL  | <MQL   | <MQL   | <MQL  | <MQL   | <MQL   | <MQL | <MQL  | <MQL   | <MQL       | <MQL      | <MQL      | <MQL  |
| 78       | <MQL  | <MQL  | <MQL  | <MQL  | <MQL   | <MQL   | <MQL  | <MQL   | <MQL   | <MQL | <MQL  | <MQL   | <MQL       | <MQL      | <MQL      | <MQL  |
| 79       | <MQL  | <MQL  | <MQL  | <MQL  | <MQL   | <MQL   | <MQL  | <MQL   | <MQL   | QL   | QL    | <MQL   | <MQL       | <MQL      | <MQL      | <MQL  |
| 80       | <MQL  | <MQL  | <MQL  | <MQL  | <MQL   | <MQL   | <MQL  | <MQL   | <MQL   | <MQL | <MQL  | <MQL   | <MQL       | <MQL      | <MQL      | <MQL  |
| 81       | <MQL  | <MQL  | <MQL  | <MQL  | <MQL   | <MQL   | <MQL  | <MQL   | <MQL   | <MQL | <MQL  | <MQL   | <MQL       | <MQL      | <MQL      | <MQL  |
| 82       | <MQL  | <MQL  | QL    | <MQL  | QL     | <MQL   | <MQL  | <MQL   | <MQL   | <MQL | <MQL  | <MQL   | <MQL       | <MQL      | <MQL      | <MQL  |
| 83       | <MQL  | <MQL  | 0.816 | 0.397 | 1.68   | QH     | 0.679 | <MQL   | <MQL   | <MQL | <MQL  | <MQL   | <MQL       | <MQL      | <MQL      | <MQL  |
| 84       | <MQL  | <MQL  | <MQL  | <MQL  | <MQL   | <MQL   | <MQL  | <MQL   | <MQL   | <MQL | <MQL  | 0.0199 | <MQL       | <MQL      | <MQL      | <MQL  |
| 85       | <MQL  | <MQL  | QL    | <MQL  | 2.40   | <MQL   | <MQL  | <MQL   | <MQL   | <MQL | <MQL  | 0.979  | <MQL       | <MQL      | 1.47      | 0.242 |
| 86       | <MQL  | <MQL  | <MQL  | <MQL  | <MQL   | <MQL   | <MQL  | <MQL   | <MQL   | <MQL | <MQL  | <MQL   | <MQL       | <MQL      | <MQL      | <MQL  |
| 87       | <MQL  | <MQL  | <MQL  | <MQL  | <MQL   | <MQL   | <MQL  | <MQL   | <MQL   | <MQL | <MQL  | <MQL   | <MQL       | <MQL      | <MQL      | <MQL  |
| 88       | <MQL  | <MQL  | <MQL  | <MQL  | <MQL   | <MQL   | <MQL  | <MQL   | <MQL   | <MQL | <MQL  | <MQL   | <MQL       | <MQL      | <MQL      | <MQL  |
| 89       | <MQL  | <MQL  | <MQL  | <MQL  | <MQL   | <MQL   | <MQL  | <MQL   | <MQL   | <MQL | QL    | <MQL   | <MQL       | <MQL      | <MQL      | <MQL  |



| Sample # | PFCAs |       |       |       |      |      |      |        |        | PFSAs |       |      | Precursors |           |           |      |
|----------|-------|-------|-------|-------|------|------|------|--------|--------|-------|-------|------|------------|-----------|-----------|------|
|          | PFBA  | PFPeA | PFHxA | PFHpA | PFOA | PFNA | PFDA | PFUnDA | PFDoDA | PFBS  | PFHxS | PFOS | 6:2 FtS    | N-MeFOSAA | N-EtFOSAA | FOSA |
| 90       | <MQL  | <MQL  | <MQL  | <MQL  | <MQL | <MQL | <MQL | <MQL   | <MQL   | <MQL  | <MQL  | <MQL | <MQL       | <MQL      | <MQL      | <MQL |
| 91       | <MQL  | <MQL  | <MQL  | <MQL  | <MQL | <MQL | <MQL | <MQL   | <MQL   | <MQL  | <MQL  | <MQL | <MQL       | <MQL      | <MQL      | <MQL |
| 92       | <MQL  | <MQL  | <MQL  | <MQL  | <MQL | <MQL | <MQL | <MQL   | <MQL   | <MQL  | <MQL  | <MQL | <MQL       | <MQL      | <MQL      | <MQL |
| 93       | <MQL  | <MQL  | <MQL  | <MQL  | <MQL | <MQL | <MQL | <MQL   | <MQL   | <MQL  | <MQL  | <MQL | <MQL       | <MQL      | <MQL      | <MQL |
| 94       | <MQL  | <MQL  | <MQL  | <MQL  | <MQL | <MQL | <MQL | <MQL   | <MQL   | <MQL  | <MQL  | <MQL | <MQL       | <MQL      | <MQL      | <MQL |

**Table S5.** LC-MS/MS results for all PFASs quantified ( $\mu\text{g kg}^{-1}$ ). Samples above the MQL, but with qualifiers out of range are labeled QH (qualifier above  $\pm 30\%$  range) or QL (qualifier below  $\pm 30\%$  range). PFCAs = perfluorinated carboxylates, PFSA = perfluorinated sulfonates, precursors = perfluoroalkyl acid precursors.

| Sample # | PFCAs |       |       |       |       |       |       |        |        | PFSA |       |      | Precursors |           |           |      |
|----------|-------|-------|-------|-------|-------|-------|-------|--------|--------|------|-------|------|------------|-----------|-----------|------|
|          | PFBA  | PFPeA | PFHxA | PFHpA | PFOA  | PFNA  | PFDA  | PFUnDA | PFDoDA | PFBS | PFHxS | PFOS | 6:2 FtS    | N-MeFOSAA | N-EtFOSAA | FOSA |
| 1        | 602   | 59.4  | 773   | 30.5  | 8.51  | <MQL  | 1.09  | <MQL   | <MQL   | <MQL | <MQL  | <MQL | <MQL       | <MQL      | 0.350     | <MQL |
| 2        | 587   | <MQL  | 720   | 26.2  | 7.07  | 0.394 | 1.33  | <MQL   | 0.481  | <MQL | <MQL  | <MQL | 0.451      | 0.786     | 0.697     | <MQL |
| 3        | 1.61  | 1.80  | 10.0  | 5.11  | 38.3  | 6.20  | 57.4  | 5.31   | 45.3   | <MQL | <MQL  | <MQL | <MQL       | <MQL      | <MQL      | <MQL |
| 4        | 8.16  | 6.38  | 40.9  | 2.72  | <MQL  | <MQL  | <MQL  | <MQL   | <MQL   | <MQL | <MQL  | <MQL | <MQL       | <MQL      | <MQL      | <MQL |
| 5        | <MQL  | <MQL  | 3.92  | 3.50  | 36.9  | 3.88  | 33.1  | 2.88   | 15.4   | <MQL | <MQL  | <MQL | <MQL       | <MQL      | <MQL      | <MQL |
| 6        | <MQL  | 1.35  | 7.19  | 3.53  | 30.3  | 3.32  | 28.0  | 2.10   | 13.5   | <MQL | <MQL  | <MQL | <MQL       | <MQL      | <MQL      | <MQL |
| 7        | <MQL  | <MQL  | 4.93  | 1.72  | 7.18  | 0.864 | 5.74  | QH     | 3.88   | <MQL | <MQL  | <MQL | <MQL       | <MQL      | <MQL      | <MQL |
| 8        | <MQL  | <MQL  | 7.22  | 1.53  | <MQL  | <MQL  | <MQL  | <MQL   | <MQL   | <MQL | <MQL  | <MQL | <MQL       | <MQL      | <MQL      | <MQL |
| 9        | <MQL  | <MQL  | 1.48  | <MQL  | 0.281 | <MQL  | <MQL  | <MQL   | <MQL   | <MQL | <MQL  | <MQL | <MQL       | <MQL      | <MQL      | <MQL |
| 10       | <MQL  | <MQL  | QL    | QL    | 0.447 | 0.414 | QH    | <MQL   | <MQL   | <MQL | <MQL  | <MQL | <MQL       | <MQL      | 0.238     | <MQL |
| 11       | <MQL  | <MQL  | 32.0  | QL    | 0.452 | 0.399 | 0.659 | QL     | 0.891  | <MQL | <MQL  | <MQL | <MQL       | <MQL      | QL        | <MQL |
| 12       | <MQL  | <MQL  | 24.4  | 0.843 | 0.463 | 0.503 | 0.861 | 1.12   | 1.10   | <MQL | <MQL  | <MQL | <MQL       | <MQL      | <MQL      | <MQL |
| 13       | <MQL  | <MQL  | 5.94  | <MQL  | <MQL  | <MQL  | <MQL  | <MQL   | <MQL   | <MQL | <MQL  | <MQL | <MQL       | <MQL      | <MQL      | <MQL |
| 14       | <MQL  | <MQL  | 2.38  | <MQL  | <MQL  | <MQL  | <MQL  | <MQL   | <MQL   | <MQL | <MQL  | <MQL | <MQL       | <MQL      | <MQL      | <MQL |
| 15       | <MQL   | <MQL   | <MQL | <MQL  | <MQL | <MQL       | <MQL      | <MQL      | <MQL |
| 16       | <MQL   | <MQL   | <MQL | <MQL  | <MQL | <MQL       | <MQL      | <MQL      | <MQL |
| 17       | <MQL  | <MQL  | QL    | <MQL  | <MQL  | <MQL  | <MQL  | <MQL   | <MQL   | <MQL | <MQL  | <MQL | <MQL       | <MQL      | <MQL      | <MQL |
| 18       | <MQL  | <MQL  | QL    | <MQL  | <MQL  | <MQL  | <MQL  | <MQL   | <MQL   | <MQL | <MQL  | <MQL | <MQL       | <MQL      | <MQL      | <MQL |
| 19       | <MQL   | <MQL   | <MQL | <MQL  | <MQL | <MQL       | <MQL      | <MQL      | <MQL |
| 20       | <MQL   | <MQL   | <MQL | <MQL  | <MQL | <MQL       | <MQL      | <MQL      | <MQL |
| 21       | <MQL   | <MQL   | <MQL | <MQL  | <MQL | <MQL       | <MQL      | <MQL      | <MQL |
| 22       | <MQL   | <MQL   | <MQL | <MQL  | <MQL | <MQL       | <MQL      | <MQL      | <MQL |



| Sample # | PFCAs |       |       |       |       |       |         |        |        | PFSA  |       |       | Precursors |           |           |       |
|----------|-------|-------|-------|-------|-------|-------|---------|--------|--------|-------|-------|-------|------------|-----------|-----------|-------|
|          | PFBA  | PFPeA | PFHxA | PFHpA | PFOA  | PFNA  | PFDA    | PFUnDA | PFDoDA | PFBS  | PFHxS | PFOS  | 6:2 FtS    | N-MeFOSAA | N-EtFOSAA | FOSA  |
| 49       | 3.24  | <MQL  | <MQL  | <MQL  | <MQL  | <MQL  | <MQL    | <MQL   | <MQL   | QL    | QL    | <MQL  | <MQL       | <MQL      | <MQL      | <MQL  |
| 50       | <MQL  | <MQL  | QH    | <MQL  | 0.485 | <MQL  | <MQL    | <MQL   | <MQL   | 2.40  | <MQL  | <MQL  | <MQL       | <MQL      | <MQL      | <MQL  |
| 51       | 3.62  | 1.90  | 8.31  | 0.440 | 0.564 | <MQL  | 0.332   | <MQL   | <MQL   | <MQL  | <MQL  | <MQL  | QH         | <MQL      | <MQL      | <MQL  |
| 52       | <MQL  | <MQL  | 1.31  | <MQL  | QL    | <MQL  | <MQL    | <MQL   | <MQL   | 0.764 | <MQL  | <MQL  | <MQL       | <MQL      | <MQL      | <MQL  |
| 53       | 0.766 | <MQL  | <MQL  | <MQL  | <MQL  | <MQL  | <MQL    | <MQL   | <MQL   | 0.683 | QL    | <MQL  | <MQL       | <MQL      | <MQL      | <MQL  |
| 54       | 2.21  | <MQL  | 4.24  | 0.395 | 0.288 | QL    | <MQL    | <MQL   | <MQL   | <MQL  | <MQL  | <MQL  | QH         | <MQL      | <MQL      | <MQL  |
| 55       | 0.561 | <MQL  | <MQL  | <MQL  | <MQL  | <MQL  | <MQL    | <MQL   | <MQL   | 0.608 | QL    | <MQL  | <MQL       | <MQL      | <MQL      | <MQL  |
| 56       | <MQL  | <MQL  | 0.809 | <MQL  | <MQL  | <MQL  | <MQL    | <MQL   | <MQL   | <MQL  | <MQL  | <MQL  | <MQL       | <MQL      | <MQL      | <MQL  |
| 57       | <MQL  | <MQL  | 1.31  | <MQL  | 7.96  | <MQL  | 2.29    | <MQL   | <MQL   | <MQL  | <MQL  | <MQL  | <MQL       | <MQL      | <MQL      | <MQL  |
| 58       | <MQL  | <MQL  | <MQL  | <MQL  | 1.74  | <MQL  | QH      | <MQL   | <MQL   | <MQL  | <MQL  | <MQL  | <MQL       | <MQL      | <MQL      | <MQL  |
| 59       | <MQL  | <MQL  | <MQL  | <MQL  | 0.270 | <MQL  | <MQL    | <MQL   | 0.478  | <MQL  | <MQL  | <MQL  | <MQL       | <MQL      | <MQL      | <MQL  |
| 60       | <MQL  | 1.15  | 14.1  | 7.01  | 378   | 8.15  | 180.220 | 3.76   | 53.6   | <MQL  | <MQL  | 0.994 | 1.51       | 0.267     | 1.68      | 0.141 |
| 61       | 244   | <MQL  | 1.11  | <MQL  | 6.17  | 37.5  | QH      | 12.3   | QH     | 11.2  | <MQL  | QL    | QH         | <MQL      | QL        | 0.175 |
| 62       | <MQL  | <MQL  | 2.80  | 2.65  | 5.14  | 2.49  | QH      | QL     | 1.50   | QH    | <MQL  | 11.1  | 2.22       | QH        | QL        | <MQL  |
| 63       | <MQL  | <MQL  | 1.72  | 0.944 | 5.48  | 0.717 | QH      | <MQL   | 0.410  | QH    | 0.718 | 5.16  | <MQL       | 0.343     | 2.85      | <MQL  |
| 64       | <MQL  | <MQL  | <MQL  | QL    | 1.14  | QL    | <MQL    | <MQL   | <MQL   | <MQL  | QL    | <MQL  | <MQL       | <MQL      | 2.95      | <MQL  |
| 65       | <MQL  | <MQL  | QL    | <MQL  | 2.48  | QH    | QH      | QH     | 1.28   | <MQL  | <MQL  | 2.15  | 1.11       | <MQL      | QH        | <MQL  |
| 66       | <MQL  | <MQL  | 0.458 | <MQL  | 2.18  | <MQL  | 2.54    | <MQL   | 1.51   | <MQL  | <MQL  | <MQL  | <MQL       | <MQL      | <MQL      | <MQL  |
| 67       | <MQL  | <MQL  | <MQL  | <MQL  | 2.40  | 0.288 | 1.38    | <MQL   | 0.487  | QL    | <MQL  | <MQL  | <MQL       | <MQL      | 0.356     | <MQL  |
| 68       | <MQL  | <MQL  | <MQL  | <MQL  | 0.466 | <MQL  | <MQL    | <MQL   | <MQL   | <MQL  | <MQL  | <MQL  | 0.500      | <MQL      | QL        | <MQL  |
| 69       | <MQL    | <MQL   | <MQL   | <MQL  | <MQL  | <MQL  | <MQL       | <MQL      | <MQL      | <MQL  |
| 70       | <MQL    | <MQL   | <MQL   | <MQL  | <MQL  | <MQL  | <MQL       | <MQL      | <MQL      | <MQL  |
| 71       | <MQL    | <MQL   | <MQL   | <MQL  | <MQL  | <MQL  | <MQL       | <MQL      | <MQL      | <MQL  |
| 72       | <MQL    | <MQL   | <MQL   | <MQL  | <MQL  | <MQL  | <MQL       | <MQL      | <MQL      | <MQL  |
| 73       | <MQL    | <MQL   | <MQL   | <MQL  | <MQL  | <MQL  | <MQL       | <MQL      | <MQL      | <MQL  |
| 74       | <MQL    | <MQL   | <MQL   | <MQL  | <MQL  | <MQL  | <MQL       | <MQL      | <MQL      | <MQL  |

| Sample # | PFCAs |       |       |       |      |      |      |        |        | PFSAs |       |       | Precursors |           |           |       |
|----------|-------|-------|-------|-------|------|------|------|--------|--------|-------|-------|-------|------------|-----------|-----------|-------|
|          | PFBA  | PFPeA | PFHxA | PFHpA | PFOA | PFNA | PFDA | PFUnDA | PFDoDA | PFBS  | PFHxS | PFOS  | 6:2 FtS    | N-MeFOSAA | N-EtFOSAA | FOSA  |
| 75       | <MQL  | <MQL  | <MQL  | <MQL  | <MQL | <MQL | <MQL | <MQL   | <MQL   | <MQL  | <MQL  | <MQL  | <MQL       | <MQL      | <MQL      | <MQL  |
| 76       | <MQL  | <MQL  | <MQL  | <MQL  | <MQL | <MQL | <MQL | <MQL   | <MQL   | <MQL  | <MQL  | <MQL  | <MQL       | <MQL      | <MQL      | <MQL  |
| 77       | <MQL  | <MQL  | <MQL  | <MQL  | <MQL | <MQL | <MQL | <MQL   | <MQL   | <MQL  | <MQL  | <MQL  | <MQL       | <MQL      | <MQL      | <MQL  |
| 78       | <MQL  | <MQL  | <MQL  | <MQL  | <MQL | <MQL | <MQL | <MQL   | <MQL   | <MQL  | <MQL  | <MQL  | <MQL       | <MQL      | <MQL      | <MQL  |
| 79       | <MQL  | <MQL  | <MQL  | <MQL  | <MQL | <MQL | <MQL | <MQL   | <MQL   | QL    | QL    | <MQL  | <MQL       | <MQL      | <MQL      | <MQL  |
| 80       | <MQL  | <MQL  | <MQL  | <MQL  | <MQL | <MQL | <MQL | <MQL   | <MQL   | <MQL  | <MQL  | <MQL  | <MQL       | <MQL      | <MQL      | <MQL  |
| 81       | <MQL  | <MQL  | <MQL  | <MQL  | <MQL | <MQL | <MQL | <MQL   | <MQL   | <MQL  | <MQL  | <MQL  | <MQL       | <MQL      | <MQL      | <MQL  |
| 82       | <MQL  | <MQL  | QL    | <MQL  | QL   | <MQL | <MQL | <MQL   | <MQL   | <MQL  | <MQL  | <MQL  | <MQL       | <MQL      | <MQL      | <MQL  |
| 83       | <MQL  | <MQL  | 0.857 | 0.484 | 2.33 | QH   | 1.17 | <MQL   | <MQL   | <MQL  | <MQL  | <MQL  | <MQL       | <MQL      | <MQL      | <MQL  |
| 84       | <MQL  | <MQL  | <MQL  | <MQL  | <MQL | <MQL | <MQL | <MQL   | <MQL   | <MQL  | <MQL  | 0.214 | <MQL       | <MQL      | <MQL      | <MQL  |
| 85       | <MQL  | <MQL  | QL    | <MQL  | 1.22 | <MQL | <MQL | <MQL   | <MQL   | <MQL  | <MQL  | 0.600 | <MQL       | <MQL      | 1.06      | 0.148 |
| 86       | <MQL  | <MQL  | <MQL  | <MQL  | <MQL | <MQL | <MQL | <MQL   | <MQL   | <MQL  | <MQL  | <MQL  | <MQL       | <MQL      | <MQL      | <MQL  |
| 87       | <MQL  | <MQL  | <MQL  | <MQL  | <MQL | <MQL | <MQL | <MQL   | <MQL   | <MQL  | <MQL  | <MQL  | <MQL       | <MQL      | <MQL      | <MQL  |
| 88       | <MQL  | <MQL  | <MQL  | <MQL  | <MQL | <MQL | <MQL | <MQL   | <MQL   | <MQL  | <MQL  | <MQL  | <MQL       | <MQL      | <MQL      | <MQL  |
| 89       | <MQL  | <MQL  | <MQL  | <MQL  | <MQL | <MQL | <MQL | <MQL   | <MQL   | <MQL  | QL    | <MQL  | <MQL       | <MQL      | <MQL      | <MQL  |
| 90       | <MQL  | <MQL  | <MQL  | <MQL  | <MQL | <MQL | <MQL | <MQL   | <MQL   | <MQL  | <MQL  | <MQL  | <MQL       | <MQL      | <MQL      | <MQL  |
| 91       | <MQL  | <MQL  | <MQL  | <MQL  | <MQL | <MQL | <MQL | <MQL   | <MQL   | <MQL  | <MQL  | <MQL  | <MQL       | <MQL      | <MQL      | <MQL  |
| 92       | <MQL  | <MQL  | <MQL  | <MQL  | <MQL | <MQL | <MQL | <MQL   | <MQL   | <MQL  | <MQL  | <MQL  | <MQL       | <MQL      | <MQL      | <MQL  |
| 93       | <MQL  | <MQL  | <MQL  | <MQL  | <MQL | <MQL | <MQL | <MQL   | <MQL   | <MQL  | <MQL  | <MQL  | <MQL       | <MQL      | <MQL      | <MQL  |
| 94       | <MQL  | <MQL  | <MQL  | <MQL  | <MQL | <MQL | <MQL | <MQL   | <MQL   | <MQL  | <MQL  | <MQL  | <MQL       | <MQL      | <MQL      | <MQL  |

**Table S6.** LC-MS/MS method quantification limits (MQL). The range of MQLs is presented below. MQL was separately determined for each batch of analyses to account for any variation in LC-MS/MS conditions.

| <b>Compound</b>  | <b>MQL Range (ng g<sup>-1</sup>)</b> |
|------------------|--------------------------------------|
| <b>PFBA</b>      | 0.32 - 1.1                           |
| <b>PFPeA</b>     | 0.080 - 1.5                          |
| <b>PFHxA</b>     | 0.43 - 1.8                           |
| <b>PFHpA</b>     | 0.11 - 1.9                           |
| <b>PFOA</b>      | 0.22 - 0.58                          |
| <b>PFNA</b>      | 0.15 - 1.6                           |
| <b>PFDA</b>      | 0.29 - 2.0                           |
| <b>PFUnDA</b>    | 0.40 - 2.6                           |
| <b>PFDoDA</b>    | 0.41 - 3.7                           |
| <b>PFBS</b>      | 0.063 - 0.31                         |
| <b>PFHxS</b>     | 0.078 - 0.40                         |
| <b>PFOS</b>      | 0.20 - 2.9                           |
| <b>6:2 FtS</b>   | 0.082 - 0.14                         |
| <b>N-MeFOSAA</b> | 0.24 - 1.3                           |
| <b>N-EtFOSAA</b> | 0.22 - 1.6                           |
| <b>FOSA</b>      | 0.063 - 0.45                         |

**Table S7.** LC-MS/MS recovery and precision results. Average percent recovery, and relative standard deviation (RSD) of native PFAS spikes (7.2 ng) added to a plate (n = 4), curtain (n = 4), and carpet (n = 4) before extraction. PFAS concentrations were <MQL in the plate, curtain, and carpet before spiking.

|           | Plate (n = 4)      |       | Curtain (n = 4)    |       | Carpet (n = 4)     |       |
|-----------|--------------------|-------|--------------------|-------|--------------------|-------|
|           | Average % Recovery | % RSD | Average % Recovery | % RSD | Average % Recovery | % RSD |
| PFBA      | 109                | 2.55  | 103                | 3.55  | 102                | 2.07  |
| PFPeA     | 104                | 1.75  | 92.7               | 2.93  | 96                 | 1.80  |
| PFHxA     | 111                | 2.12  | 103                | 3.17  | 103                | 1.56  |
| PFHpA     | 119                | 2.88  | 104                | 3.29  | 109                | 2.07  |
| PFOA      | 109                | 1.51  | 103                | 2.53  | 105                | 1.59  |
| PFNA      | 111                | 4.13  | 104                | 4.34  | 107                | 6.12  |
| PFDA      | 123                | 5.47  | 113                | 3.74  | 114                | 4.38  |
| PFUnDA    | 112                | 7.40  | 104                | 6.02  | 108                | 8.08  |
| PFDoDA    | 110                | 8.22  | 105                | 7.26  | 108                | 3.64  |
| PFBS      | 66.3               | 4.78  | 80.3               | 1.54  | 78.6               | 5.58  |
| PFHxS     | 73.4               | 5.37  | 84.5               | 2.47  | 97.0               | 5.43  |
| PFOS      | 85.8               | 4.33  | 93.9               | 4.77  | 88.3               | 6.12  |
| 6:2 FtS   | 99.3               | 28.4  | 80.2               | 4.09  | 84.9               | 5.53  |
| 8:2 FtS   | 104                | 5.42  | 139                | 8.52  | 22.6               | 6.75  |
| N-MeFOSAA | 106                | 5.82  | 101                | 8.52  | 97.9               | 7.54  |
| N-EtFOSAA | 126                | 8.97  | 109                | 4.99  | 116                | 7.85  |
| FOSA      | 69.0               | 5.51  | 78.5               | 7.54  | 69.7               | 4.58  |

**Table S8.** XPS results. The limit of detection (LOD) is 1 atomic percent.

| Sample | Average Atomic % F Pre-Extraction | Minimum/Maximum Atomic % F | Average Weight % F Pre-Extraction | Minimum/Maximum Weight % F | Average Atomic % F Post-Extraction | Minimum/Maximum Atomic % F |
|--------|-----------------------------------|----------------------------|-----------------------------------|----------------------------|------------------------------------|----------------------------|
| 1      | 9.74                              | 8.76/10.7                  | 13.3                              | 12.0/14.6                  | 12.8                               | 12.0/14.2                  |
| 2      | 8.45                              | 7.09/9.80                  | 11.6                              | 9.76/13.4                  | 14.2                               | 13.7/14.7                  |
| 4      | 17.7                              | 16.4/19.1                  | 23.2                              | 21.5/24.9                  | 18.8                               | 17.6/20.0                  |
| 7      | <LOD                              |                            | <LOD                              |                            | N/A                                |                            |
| 8      | 14.2                              | 13.7/14.8                  | 19.2                              | 18.5/20.0                  | 24.3                               | 23.3/25.2                  |
| 9      | <LOD                              |                            | <LOD                              |                            | 1.32                               | 1.21/1.42                  |
| 10     | <LOD                              |                            | <LOD                              |                            | N/A                                |                            |
| 11     | <LOD                              |                            | <LOD                              |                            | N/A                                |                            |
| 12     | <LOD                              |                            | <LOD                              |                            | N/A                                |                            |
| 14     | 28.3                              | 27.0/29.6                  | 36.0                              | 34.5/37.4                  | 18.5                               | 18.2/18.8                  |
| 15     | <LOD                              |                            | <LOD                              |                            | N/A                                |                            |
| 16     | <LOD                              |                            | <LOD                              |                            | <LOD                               |                            |
| 17     | <LOD                              |                            | <LOD                              |                            | N/A                                |                            |
| 18     | <LOD                              |                            | <LOD                              |                            | N/A                                |                            |
| 19     | <LOD                              |                            | <LOD                              |                            | N/A                                |                            |
| 20     | <LOD                              |                            | <LOD                              |                            | N/A                                |                            |
| 32     | <LOD                              |                            | <LOD                              |                            | N/A                                |                            |
| 33     | <LOD                              |                            | <LOD                              |                            | N/A                                |                            |
| 47     | 34.5                              | 32.7/36.3                  | 42.5                              | 40.7/44.3                  | 31.9                               | 30.6/35.1                  |
| 51     | 44.9                              | 43.6/46.2                  | 54.6                              | 54.0/55.2                  | 31.8                               | 31.6/31.9                  |
| 54     | 31.1                              | 30.8/31.5                  | 38.5                              | 38.1/39.0                  | 20.4                               | 18.2/21.6                  |
| 59     | <LOD                              |                            | <LOD                              |                            | N/A                                |                            |
| 61     | 6.38                              | 5.64/7.12                  | 8.60                              | 7.63/9.48                  | 3.91                               | 3.25/4.56                  |
| 62     | <LOD                              |                            | <LOD                              |                            | N/A                                |                            |
| 64     | <LOD                              |                            | <LOD                              |                            | N/A                                |                            |
| 65     | <LOD                              |                            | <LOD                              |                            | N/A                                |                            |
| 66     | <LOD                              |                            | <LOD                              |                            | N/A                                |                            |
| 67     | 7.39                              | 6.83/7.94                  | 9.96                              | 9.25/10.7                  | 5.71                               | 5.25/6.17                  |
| 68     | 3.70                              | 3.61/3.79                  | 4.99                              | 4.81/5.16                  | 2.32                               | 2.17/2.46                  |
| 71     | <LOD                              |                            | <LOD                              |                            | N/A                                |                            |
| 79     | <LOD                              |                            | <LOD                              |                            | N/A                                |                            |
| 81     | <LOD                              |                            | <LOD                              |                            | <LOD                               |                            |
| 82     | <LOD                              |                            | <LOD                              |                            | <LOD                               |                            |
| 83     | <LOD                              |                            | <LOD                              |                            | N/A                                |                            |
| 84     | <LOD                              |                            | <LOD                              |                            | N/A                                |                            |
| 85     | <LOD                              |                            | <LOD                              |                            | N/A                                |                            |
| 86     | <LOD                              |                            | <LOD                              |                            | <LOD                               |                            |
| 87     | <LOD                              |                            | <LOD                              |                            | N/A                                |                            |
| 88     | <LOD                              |                            | <LOD                              |                            | N/A                                |                            |
| 89     | <LOD                              |                            | <LOD                              |                            | N/A                                |                            |
| 90     | <LOD                              |                            | <LOD                              |                            | N/A                                |                            |
| 91     | <LOD                              |                            | <LOD                              |                            | N/A                                |                            |
| 92     | <LOD                              |                            | <LOD                              |                            | N/A                                |                            |
| 93     | <LOD                              |                            | <LOD                              |                            | N/A                                |                            |
| 94     | <LOD                              |                            | <LOD                              |                            | N/A                                |                            |



**Table S9.** LC-QTOF-MS results. Name, family, molecular formula, theoretical m/z, and peak area for sample methanol extracts. Data analyzed at Purdue University, Department of Agronomy, Interdisciplinary Ecological Science and Engineering.

| Negative Mode |                                          |                                         |                   |                 |       |
|---------------|------------------------------------------|-----------------------------------------|-------------------|-----------------|-------|
| Sample        | Name                                     | Family                                  | Molecular Formula | Theoretical m/z | Area  |
| 1             | 2-perfluorohexyl ethanoic acid (FHEA)    | Fluorotelomer carboxylic acids (FTCAs)  | C8H3F13O2         | 376.98472       | 2880  |
|               | Perfluoro-n-pentanoic acid (PFPeA)       | Perfluoroalkyl carboxylic acids (PFCAs) | C5HF9O2           | 262.97546       | 2186  |
|               | Perfluoro-n-hexanoic acid (PFHxA)        | Perfluoroalkyl carboxylic acids (PFCAs) | C6HF11O2          | 312.97226       | 44303 |
|               | 3-Perfluoropentyl propanoic acid (FPePA) | Fluorotelomer carboxylic acids (FTCAs)  | C8H5F11O2         | 341.00356       | 1822  |
|               | 2H-perfluoro-2-octenoic acid (FHUEA)     | Fluorotelomer unsaturated acids (FTUA)  | C8H2F12O2         | 356.97849       | 15413 |
|               | 10:2 fluorotelomer sulfonate (10:2 FTS)  | Fluorotelomer sulfonic acids (FTSs)     | C12H5F21O3S       | 626.95458       | 596   |
|               | 6:2 fluorotelomer sulfonate (6:2 FTS)    | Fluorotelomer sulfonic acids (FTSs)     | C8H5F13O3S        | 426.96736       | 294   |
|               | Perfluoro-n-octanoic acid (PFOA)         | Perfluoroalkyl carboxylic acids (PFCAs) | C8HF15O2          | 412.96588       | 1575  |
| 2             | 2-perfluorohexyl ethanoic acid (FHEA)    | Fluorotelomer carboxylic acids (FTCAs)  | C8H3F13O2         | 376.98472       | 1948  |
|               | Perfluoro-n-pentanoic acid (PFPeA)       | Perfluoroalkyl carboxylic acids (PFCAs) | C5HF9O2           | 262.97546       | 1820  |
|               | Perfluoro-n-hexanoic acid (PFHxA)        | Perfluoroalkyl carboxylic acids (PFCAs) | C6HF11O2          | 312.97226       | 45527 |
|               | 2H-perfluoro-2-octenoic acid (FHUEA)     | Fluorotelomer unsaturated acids (FTUA)  | C8H2F12O2         | 356.97849       | 9946  |
|               | Perfluoro-n-butanoic acid (PFBA)         | Perfluoroalkyl carboxylic acids (PFCAs) | C4HF7O2           | 212.97865       | 4261  |
|               | 10:2 fluorotelomer sulfonate (10:2 FTS)  | Fluorotelomer sulfonic acids (FTSs)     | C12H5F21O3S       | 626.95458       | 439   |
|               | 6:2 fluorotelomer sulfonate (6:2 FTS)    | Fluorotelomer sulfonic acids (FTSs)     | C8H5F13O3S        | 426.96736       | 321   |
|               | Perfluoro-n-octanoic acid (PFOA)         | Perfluoroalkyl carboxylic acids (PFCAs) | C8HF15O2          | 412.96588       | 706   |
| 4             | 3-Perfluoropentyl propanoic acid (FPePA) | Fluorotelomer carboxylic acids (FTCAs)  | C8H5F11O2         | 341.00356       | 1216  |
|               | 2H-perfluoro-2-octenoic acid (FHUEA)     | Fluorotelomer unsaturated acids (FTUA)  | C8H2F12O2         | 356.97849       | 2635  |
|               | Perfluoro-n-hexanoic acid (PFHxA)        | Perfluoroalkyl carboxylic acids (PFCAs) | C6HF11O2          | 312.97226       | 6597  |
|               | Perfluoro-n-butanoic acid (PFBA)         | Perfluoroalkyl carboxylic acids (PFCAs) | C4HF7O2           | 212.97865       | 286   |
|               | Perfluoro-n-pentanoic acid (PFPeA)       | Perfluoroalkyl carboxylic acids (PFCAs) | C5HF9O2           | 262.97546       | 512   |
| 8             | Perfluoro-n-hexanoic acid (PFHxA)        | Perfluoroalkyl carboxylic acids (PFCAs) | C6HF11O2          | 312.97226       | 327   |
| 14            | Not Detected                             |                                         |                   |                 |       |

|                      |                                                                          |                                                         |                |            |        |
|----------------------|--------------------------------------------------------------------------|---------------------------------------------------------|----------------|------------|--------|
| 47                   | Perfluoro-n-pentanoic acid (PFPeA)                                       | Perfluoroalkyl carboxylic acids (PFCAs)                 | C5HF9O2        | 262.97546  | 267    |
|                      | 6:2, 8:2 fluorotelomer phosphate diester                                 | Polyfluoroalkyl phosphoric acid diesters (diPAPs)       | C18H9F30O4P    | 888.96811  | 483    |
|                      | Perfluoro-n-hexanoic acid (PFHxA)                                        | Perfluoroalkyl carboxylic acids (PFCAs)                 | C6HF11O2       | 312.97226  | 607    |
| 51                   | Perfluoro-n-octanoic acid (PFOA)                                         | Perfluoroalkyl carboxylic acids (PFCAs)                 | C8HF15O2       | 412.96588  | 170    |
|                      | 6:2, 6:2 fluorotelomer phosphate diester                                 | Polyfluoroalkyl phosphoric acid diesters (diPAPs)       | C16H9F26O4P    | 788.97450  | 371    |
|                      | 8:2, 8:2 fluorotelomer phosphate diester                                 | Polyfluoroalkyl phosphoric acid diesters (diPAPs)       | C20H9F34O4P    | 988.96173  | 175    |
| 54                   | Perfluoro-n-hexanoic acid (PFHxA)                                        | Perfluoroalkyl carboxylic acids (PFCAs)                 | C6HF11O2       | 312.97226  | 297    |
|                      | Perfluorononane sulfonate (PFNS)                                         | Perfluoroalkyl sulfonic acids (PFSAs)                   | C9HF19O3S      | 548.92647  | 100681 |
|                      | Perfluoro-n-butanoic acid (PFBA)                                         | Perfluoroalkyl carboxylic acids (PFCAs)                 | C4HF7O2        | 212.97865  | 838    |
| 61                   | Perfluoro-n-nonanoic acid (PFNA)                                         | Perfluoroalkyl carboxylic acids (PFCAs)                 | C9HF17O2       | 462.96268  | 1179   |
|                      | Perfluoro-n-undecanoic acid (PFUnDA)                                     | Perfluoroalkyl carboxylic acids (PFCAs)                 | C11HF21O2      | 562.95629  | 845    |
|                      | 6:2, 6:2 fluorotelomer phosphate diester                                 | Polyfluoroalkyl phosphoric acid diesters (diPAPs)       | C16H9F26O4P    | 788.97450  | 39     |
|                      | 8:2, 8:2 fluorotelomer phosphate diester                                 | Polyfluoroalkyl phosphoric acid diesters (diPAPs)       | C20H9F34O4P    | 988.96173  | 301    |
| 67                   | Perfluoro-n-octanoic acid (PFOA)                                         | Perfluoroalkyl carboxylic acids (PFCAs)                 | C8HF15O2       | 412.96588  | 348    |
|                      | 8:2, 10:2 fluorotelomer phosphate diester                                | Polyfluoroalkyl phosphoric acid diesters (diPAPs)       | C22H9F38O4P    | 1088.95534 | 143    |
|                      | 6:2, 8:2 fluorotelomer phosphate diester                                 | Polyfluoroalkyl phosphoric acid diesters (diPAPs)       | C18H9F30O4P    | 888.96811  | 61     |
| 68                   | 6:2, 6:2 fluorotelomer phosphate diester                                 | Polyfluoroalkyl phosphoric acid diesters (diPAPs)       | C16H9F26O4P    | 788.97450  | 780    |
|                      | 6:2, 8:2 fluorotelomer phosphate diester                                 | Polyfluoroalkyl phosphoric acid diesters (diPAPs)       | C18H9F30O4P    | 888.96811  | 236    |
| <b>Positive Mode</b> |                                                                          |                                                         |                |            |        |
| 47                   | Perfluoropentane sulfonamido propyl dimethyl quaternary amine propanoate | Perfluoroalkyl sulfonamide amino carboxylates (PFSaAmA) | C13H17F11N2O4S | 507.08116  | 2239   |
| 54                   | Perfluoropentane sulfonamido propyl dimethyl quaternary amine propanoate | Perfluoroalkyl sulfonamide amino carboxylates (PFSaAmA) | C13H17F11N2O4S | 507.08116  | 445    |

1 **Figures**  
2

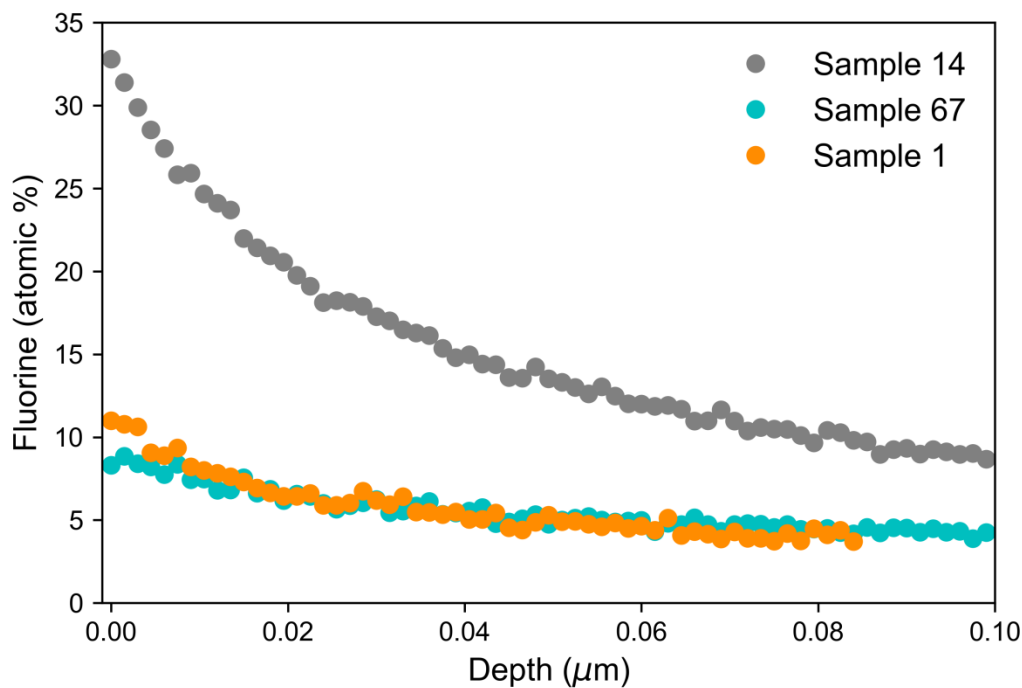

3  
4  
5 **Figure S1.** Depth profiles of sample 14 (food bag), sample 67 (used jacket), and sample 1  
6 (bowl). Each point is a XPS measurement taken in between etching intervals (etching  
7 completed with an argon ion beam with 10 second intervals). The depth of etching for a  
8 tantalum pentoxide reference is plotted.

9  
10  
11  
12  
13  
14  
15  
16  
17

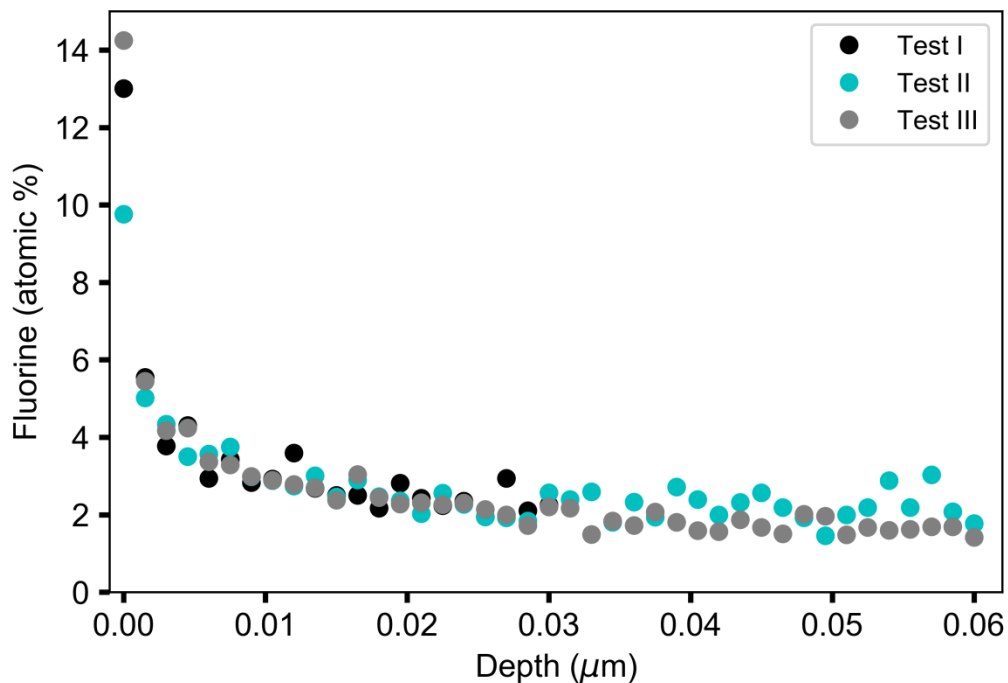

18 **Figure S2.** Repetitive depth profile analysis of sample 4 (a takeout box). Each point is a XPS  
 19 measurement taken in between etching intervals (etching completed with an argon ion beam  
 20 with 10 second intervals). The depth of etching for a tantalum pentoxide reference is plotted.  
 21  
 22  
 23  
 24  
 25  
 26  
 27  
 28  
 29

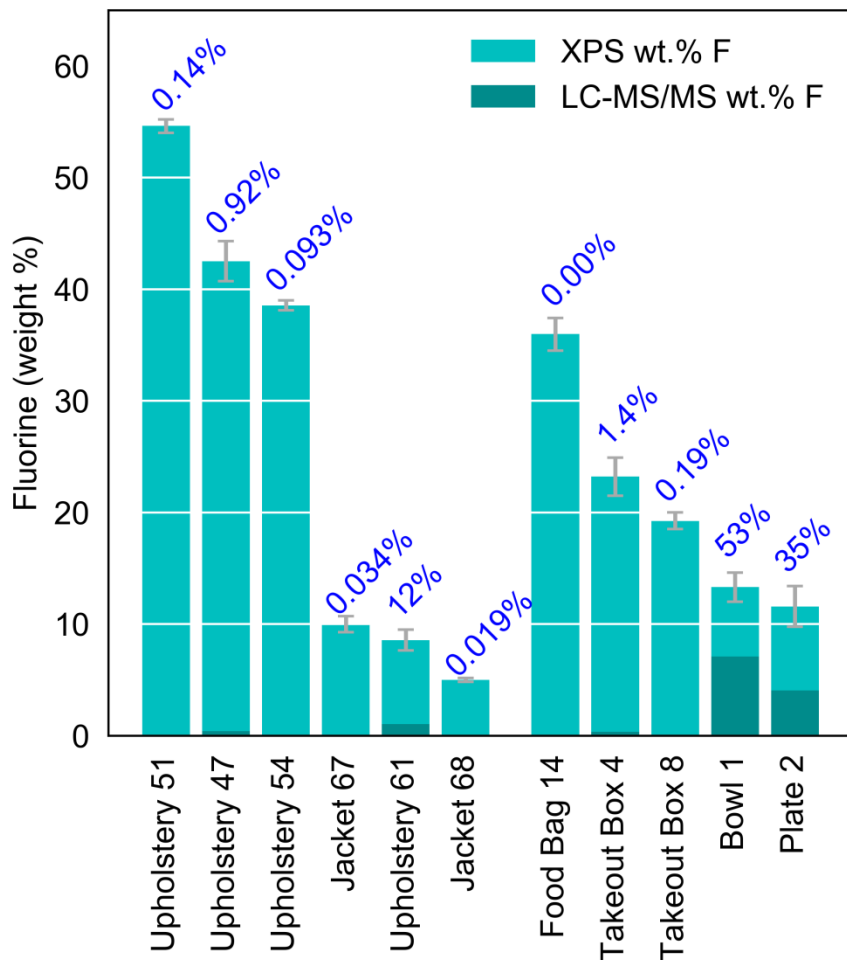

30

31 **Figure S3.** XPS wt.% F and LC-MS/MS wt.% F comparison. Whiskers are the minimum and  
 32 maximum wt.% F from XPS, the bar is the average wt.% F. The percent of fluorine in the XPS  
 33 explained by LC-MS/MS is labeled in blue at the top of each bar.

34

35

36

37

38

39

40

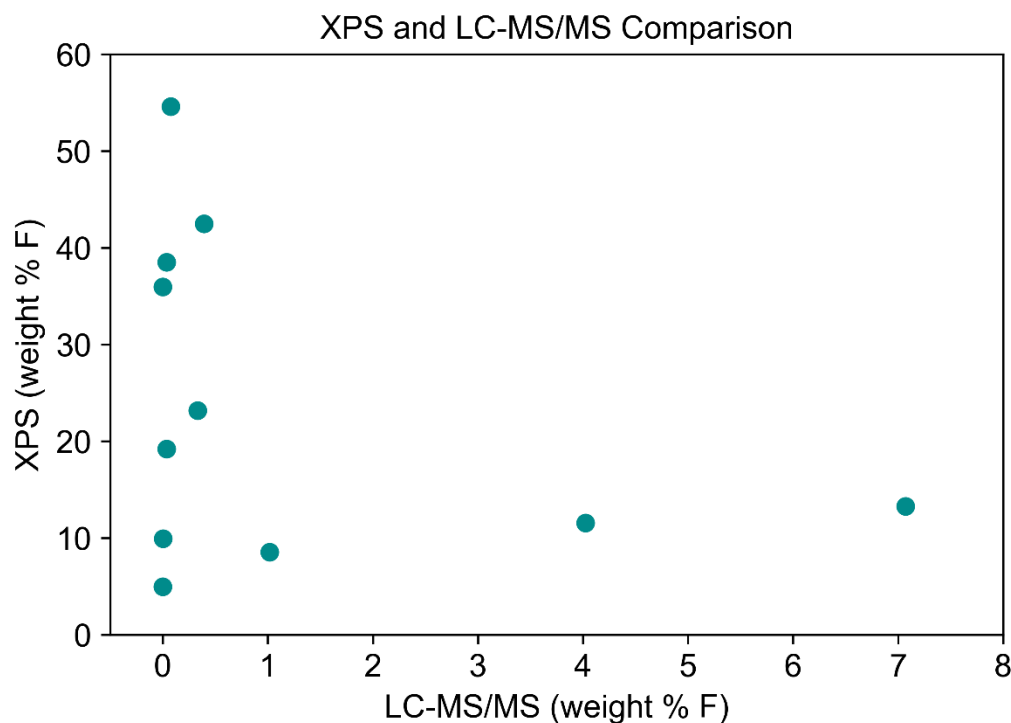

41  
42  
43  
44  
45  
46  
47  
48  
49

**Figure S4.** Comparison of LC-MS/MS and XPS data.

## References

- 50 (1) Yuan, G.; Peng, H.; Huang, C.; Hu, J. Ubiquitous occurrence of fluorotelomer alcohols in eco-friendly  
51 paper-made food-contact materials and their implication for human exposure. *Environ. Sci. Technol.*  
52 **2016**, *50* (2), 942-950, DOI: 10.1021/acs.est.5b03806
- 53 (2) Robel, A. E.; Marshall, K.; Dickinson, M.; Lunderberg, D.; Butt, C.; Peaslee, G.; Stapleton, H. M.; Field,  
54 J. A. Closing the mass balance on fluorine on papers and textiles. *Environ. Sci. Technol.* **2017**, *51* (16),  
55 9022-9032, DOI: 10.1021/acs.est.7b02080
- 56 (3) Weber, A. K.; Barber, L. B.; LeBlanc, D. R.; Sunderland, E. M.; Vecitis, C. D. Geochemical and  
57 hydrologic factors controlling subsurface transport of poly- and perfluoroalkyl substances, Cape Cod,  
58 Massachusetts. *Environ. Sci. Technol.* **2017**, *51* (8), 4269-4279, DOI: 10.1021/acs.est.6b05573
- 59 (4) Seah, M. P. Argon cluster size-dependence of sputtering yields of polymers: Molecular weights and  
60 the universal equation. *Surf. Interface Anal.* **2015**, *47* (1), 169-172, DOI: 10.1002/sia.5656
- 61 (5) Seah, M. P. Universal equation for argon gas cluster sputtering yields. *J. Phys. Chem. C* **2013**, *117* (24),  
62 12622-12632, DOI: 10.1021/jp402684c
- 63 (6) Seah, M. P.; Nunney, T. S. Sputtering yields of compounds using argon ions. *J. Phys. D: Appl. Phys.*  
64 **2010**, *43* (25), 253001, DOI: 10.1088/0022-3727/43/25/253001
- 65 (7) Cumpson, P. J.; Portoles, J. F.; Sano, N. Material dependence of argon cluster ion sputter yield in  
66 polymers: Method and measurements of relative sputter yields for 19 polymers. *J. Vac. Sci. Technol., A*  
67 **2013**, *31* (2), 020605, DOI: 10.1116/1.4791669
- 68
